# Supplementary material for: Sulfide sensor based on the room-temperature phosphorescence of ZnO/SiO2 nanocomposite
Source: Royal Society of Chemistry journal article supplement (doi:10.1039/c0an00081g), 2010-01-01
Supplement: c0an00081g.pdf [file c0an00081g.pdf]

## Supplementary Information

# **Sulfide Sensor Based on the Room-Temperature Phosphorescence of ZnO/SiO<sub>2</sub> Nanocomposite**

Na Wang<sup>a</sup>, Ting Zhou<sup>b</sup>, Jun Wang<sup>a</sup>, Hongyan Yuan<sup>\*a</sup> and Dan Xiao<sup>\*a, b</sup>

<sup>a</sup>*College of Chemical Engineering, Sichuan University, Chengdu 610065, P. R. China*

<sup>b</sup>*Key laboratory of Green Chemistry and Technology, Ministry of Education, College of Chemistry,*

*Sichuan University, Chengdu 610065, P. R. China*

*\*Corresponding authors Tel: +86-028-85415029; Fax: +86-028-85416029*

*E-mail address: yuan\_hy@scu.edu.cn (Hongyan Yuan)*

*E-mail address: xiaodan@scu.edu.cn (Dan Xiao)*

Table S1. The effect of the experiment conditions on phosphorescence intensity and spectra characteristics of the ZnO/SiO<sub>2</sub> nanocomposite and the sulfide detection ranges based on RTP of these materials.

| Zn/Si<br>(molar<br>ratio) | Calcination<br>temperature<br>(°C) | Calcination<br>time<br>(h) | Phosphorescence<br>intensity<br>(a. u.) | Maximum excitation and<br>emission wavelengths<br>(nm) | Detection range<br>(M)                        |
|---------------------------|------------------------------------|----------------------------|-----------------------------------------|--------------------------------------------------------|-----------------------------------------------|
| 1/99                      | 500                                | 2                          | 116.2                                   | 320, 460                                               | insensitive                                   |
| 5/95                      | 500                                | 2                          | 582.2                                   | 320, 460                                               | $1.46 \times 10^{-4}$ - $1.02 \times 10^{-2}$ |
| 8/92                      | 500                                | 2                          | 719.36                                  | 320, 460                                               | $4.88 \times 10^{-5}$ - $1.02 \times 10^{-2}$ |
| 10/90                     | 500                                | 2                          | 781                                     | 320, 460                                               | $4.88 \times 10^{-5}$ - $1.02 \times 10^{-2}$ |
| 12/88                     | 500                                | 2                          | 577.68                                  | 320, 460                                               | $4.88 \times 10^{-5}$ - $1.02 \times 10^{-2}$ |
| 15/85                     | 500                                | 2                          | 642.92                                  | 320, 460                                               | $4.88 \times 10^{-5}$ - $1.02 \times 10^{-2}$ |
| 20/80                     | 500                                | 2                          | 641.96                                  | 320, 460                                               | $4.88 \times 10^{-5}$ - $1.02 \times 10^{-2}$ |
| 10/90                     | 400                                | 4                          | 140.64                                  | 280, 413                                               | insensitive                                   |
| 10/90                     | 450                                | 3                          | 552                                     | 280, 411                                               | insensitive                                   |
| 10/90                     | 550                                | 1                          | 736.32                                  | 280, 400                                               | insensitive                                   |
| 10/90                     | 550                                | 2                          | 1120.24                                 | 280, 380                                               | insensitive                                   |
| 10/90                     | 650                                | 1                          | 1511.28                                 | 280, 380                                               | insensitive                                   |

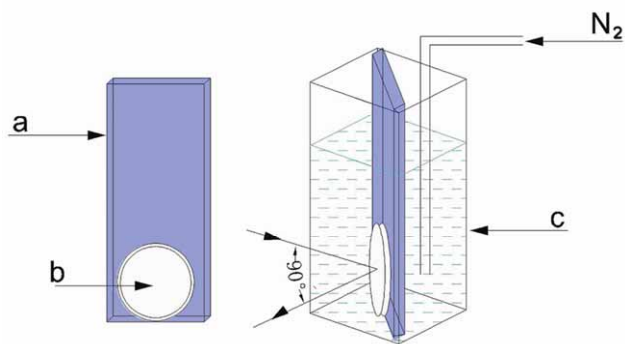

Figure S1. The diagram of the device for determination of  $\text{Na}_2\text{S}$  concentration. (a) glass slide (b) the disk of the ZnO/SiO<sub>2</sub> nanocomposite (c) quartz cuvette.

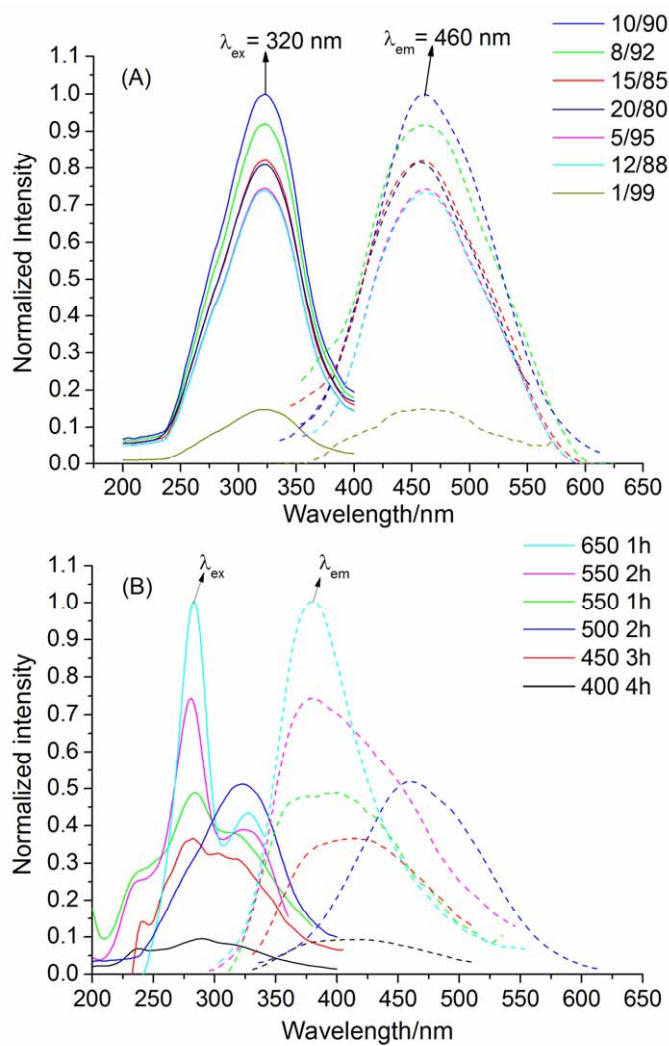

Figure S2. Excitation and emission phosphorescence spectra of ZnO/SiO<sub>2</sub> nanocomposite oxides obtained (A) with the different Zn/Si molar ratios under 500 °C for 2 h calcination and (B) under different calcination temperatures and time for the ZnO/SiO<sub>2</sub> nanocomposite with Zn/Si molar ratio = 10/90; solid lines are the excitation phosphorescence spectra and the dash lines are the emission phosphorescence spectra.

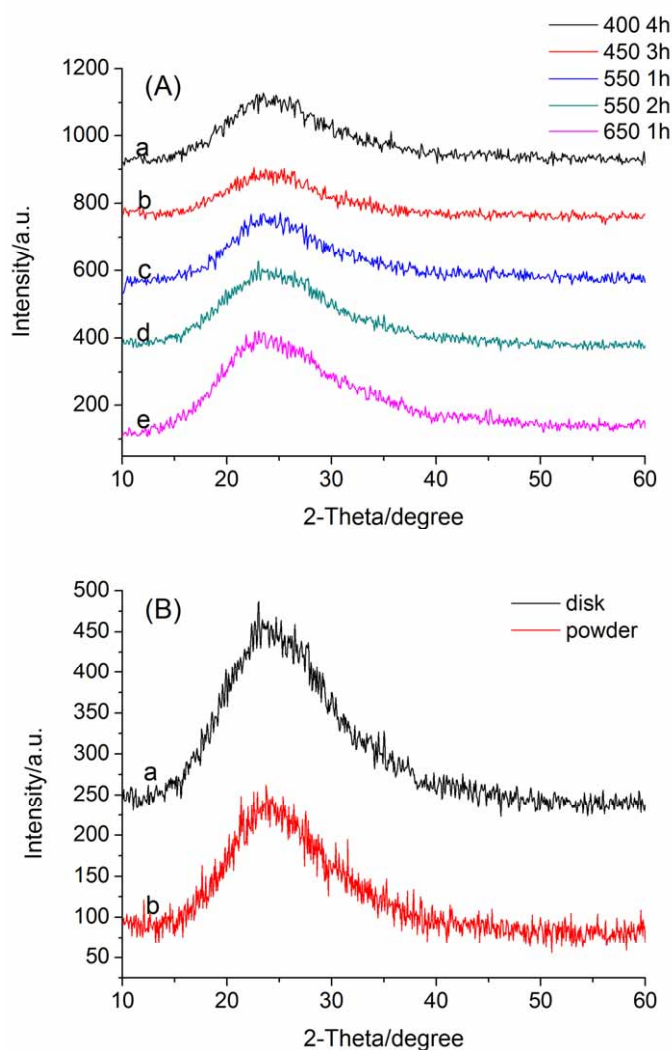

Figure S3. The XRD spectra of (A) the ZnO/SiO<sub>2</sub> with Zn/Si molar ratio = 10/90 obtained under different calcination conditions and (B) ZnO/SiO<sub>2</sub> with Zn/Si molar ratio = 10/90 obtained under 500 °C for 2 h of the (a) disk pressed used at 8 MPa and (b) powder.

It is clear from the results listed in the Table S1 and Figure S2 that the RTP emission mainly be divided into two processes: near ultraviolet (UV) emission and visible emission. Considering that neither the different calcination conditions nor the 8 MPa pressure to press the powder into a disk did not cause apparently phase changes in the materials (Figure S3), we ascribe the change of phosphorescence intensity and spectra to the competitive results of two radiative transitions (Figure S2 (B)). The UV

phosphorescence emission spectra of the material peaking at 380 nm is ascribed to the energy level of the donor state created by Zn-O-Si,<sup>21</sup> which acts as traps for UV phosphorescence. And the visible phosphorescence spectra of the material peaking at 460 nm is ascribed to the surface defects of ZnO, *i.e.* oxygen vacancies, interstitial zinc and antisite defects on the surface of ZnO/SiO<sub>2</sub> nanocomposite (see Figure 5 and Figure 6). The number of phosphorescence traps varies with the calcinations temperature and time. The longer calcination time or higher calcination temperature perhaps increases the number of phosphorescence traps for UV emission and decreases that for visible emission.<sup>19</sup> As a result, the increase of intensity for UV emission and the decrease of intensity for visible emission lead to a large blue shift of emission spectra.

Under the same calcination conditions, the phosphorescence intensity for ZnO/SiO<sub>2</sub> is shown to be a function of Zn/Si molar ratio. When the Zn/Si molar ratio increases from 1/99 to 10/90, the phosphorescence intensity of ZnO/SiO<sub>2</sub> increases rapidly with the increase of number of phosphorescence centers. When the concentration of Zn/Si molar ratio exceeds 10/90, the excessive Zn interferes with the phosphorescence centers resulting in the decrease of number of surface defects, *i.e.* self-quenching. Our previously work about the PbO/SiO<sub>2</sub> phosphor has the same self-quenching phenomena.<sup>8</sup>

8 T. Zhou, N. Wang, C. H. Li, H. Y. Yuan and D. Xiao, *Anal. Chem.*, 2010, **82**, 1705.

19 S. Chakrabarti, D. Ganguli and S Chaudhuri, *J. Phys. D: Appl. Phys.*, 2003, **36**, 146.

21 Z. P. Fu, B. F. Yang, L. Li, W. W. Dong, C. Jia and W. Wu, *J. Phys.: Condens. Matter*, 2003, **15**, 2867.

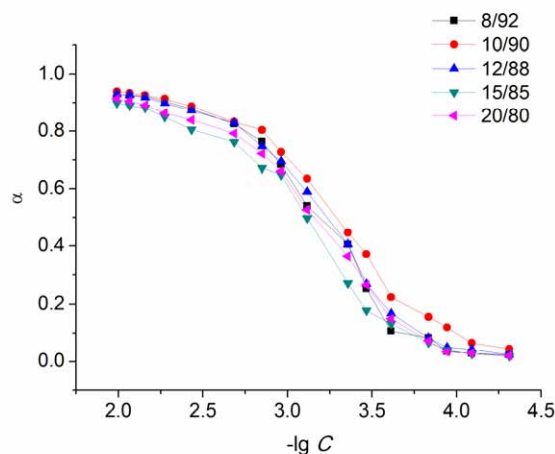

Figure S4. The response behavior of sulfide sensor. Plot of  $\alpha$  versus  $-\lg C$  of materials with different molar ratio of Zn/Si calcined at  $500\text{ }^{\circ}\text{C}$  for 2 h ;  $\alpha = (P_0 - P)/P_0$ ,  $P_0$  and  $P$  are phosphorescence intensities of the sensor in the absence and in the presence of the sulfide, respectively,  $C$  is the concentration of sulfide.

All these materials were assayed for sulfide sensing as shown in Table S1 and Figure S4. The materials emitting UV emission band and that with a lower proportion of Zn are not sensitive to sulfide. Both the ZnO nanoparticles and SiO<sub>2</sub> matrix in the nanocomposite make the contributions to this UV emission band.<sup>21</sup> However, sulfide reacts with ZnO to form ZnS while the SiO<sub>2</sub> matrix is almost not affected by the sulfide due to the chemical inertness of SiO<sub>2</sub> (see Figure 6). This may be the reason that the ZnO/SiO<sub>2</sub> nanocomposite emitting the UV phosphorescence is not sensitive to sulfide. On the other hand, the visible phosphorescence peaking at 460 nm originates from the surface defects of ZnO rather than the SiO<sub>2</sub> (see Figure 5 and Figure 6), thus this material is sensitive to sulfide without the contribution of SiO<sub>2</sub> to the visible phosphorescence emission. And for the materials with Zn/Si molar ratios of 1/99 and 5/95 calcined at  $500\text{ }^{\circ}\text{C}$  for 2 h, the small number of binding sites could be responsible for their relatively insensitive response for sulfide sensing. The response behaviors of

sulfide sensor based on the ZnO/SiO<sub>2</sub> nanocomposites with the Zn/Si molar ratios ranging from 8/92 to 20/80 were tested to select the optimizing Zn/Si molar ratio. Their detection ranges are identical but their response behaviors are not. The response behavior of this sensor is dependent on the Zn/Si molar ratio of the material. When Zn/Si molar ratio increases from 8/92 to 10/90, the  $\alpha$  value increases. As the phosphorescence emission spectra originate from the surface defects in ZnO, the material with a higher proportion of Zn has a larger number of surface defects resulting in the increase of the number of binding sites available for sulfide interaction. When the Zn/Si molar ratio increases from 10/90 to 20/80, the sensors have lower  $\alpha$  values than that of 10/90. When Zn/Si molar ratio exceeds 10/90, the number of phosphorescence centers decreases caused by the self-quenching which reduces the number of binding sites available for sulfide interaction to quench the intensity of ZnO. The excessive nonphosphorescence Zn reacting to sulfide does not make contribution to sulfide sensing. As a result, the effect of self-quenching on the response behavior of sulfide detection causes that the materials of the Zn/Si molar ratios ranging from 12/88 to 20/80 for sulfide sensing are not as sensitive to sulfide ions as the material of the Zn/Si molar ratio = 10/90. It is concluded that the material of the Zn/Si molar ratio = 10/90 calcined at 500 °C for 2 h presents the best response to sulfide ions, which is used in the next experiments.



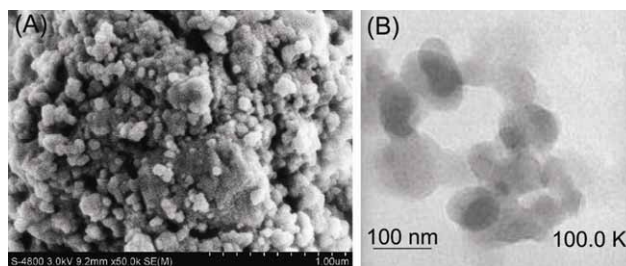

Figure S5. The (A) SEM and (B) TEM images of ZnO/SiO<sub>2</sub> nanocomposite.

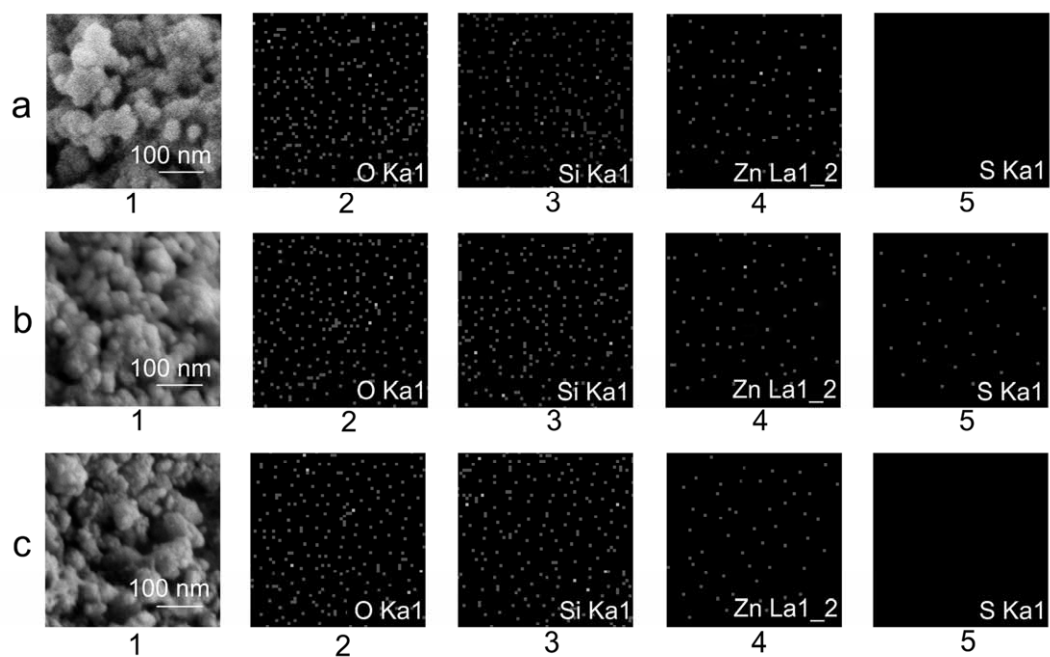

Figure S6. (1) SEM images and (2, 3, 4, 5) EDS images taken from the area of

ZnO/SiO<sub>2</sub> nanocomposite (a) before, (b) after interaction with Na<sub>2</sub>S and (c) regenerated with H<sub>2</sub>O<sub>2</sub>.

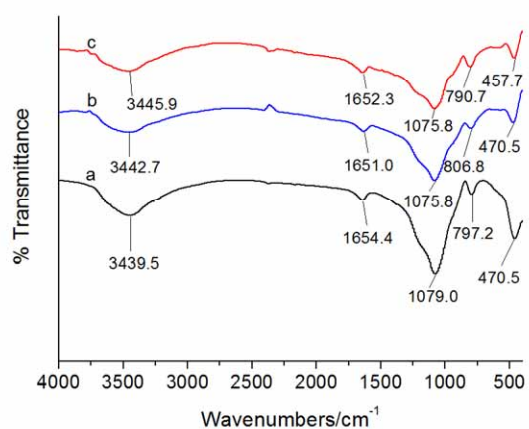

Figure S7. FT-IR spectra of (a) SiO<sub>2</sub> and the as-prepared ZnO/SiO<sub>2</sub> nanocomposite oxide (b) before and (c) after interaction with Na<sub>2</sub>S.

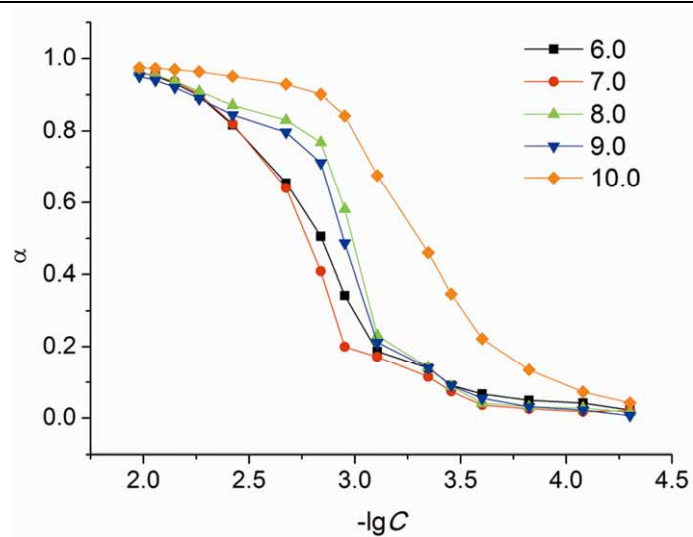

Figure S8. The response behavior of sulfide sensor. Plot of  $\alpha$  versus  $-\lg C$  at different pH values.

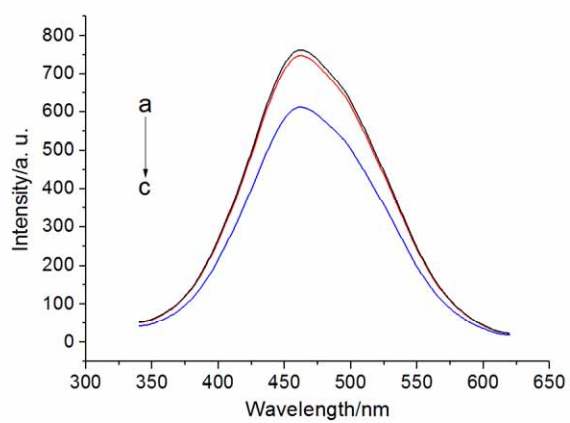

Figure S9. The phosphorescence spectra of ZnO/SiO<sub>2</sub> nanocomposite in different conditions: (a) original, regenerated (b) once and (c) twice by a H<sub>2</sub>O<sub>2</sub> solution.

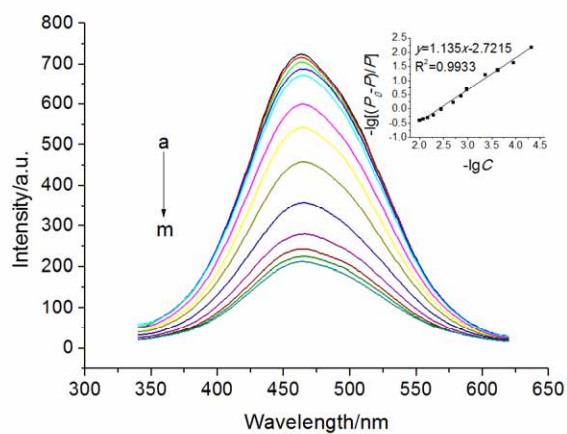

Figure S10. The effect of Na<sub>2</sub>S concentration on the emission spectra of regenerated once sensor. The sulfide concentration: (a) 0, (b)  $4.88 \times 10^{-5}$ , (c)  $1.14 \times 10^{-4}$ , (d)  $2.44 \times 10^{-4}$ , (e)  $4.39 \times 10^{-4}$ , (f)  $1.09 \times 10^{-3}$ , (g)  $1.42 \times 10^{-3}$ , (h)  $2.07 \times 10^{-3}$ , (i)  $3.69 \times 10^{-3}$ , (j)  $5.32 \times 10^{-3}$ , (k)  $6.95 \times 10^{-3}$ , (l)  $8.57 \times 10^{-3}$  and (m)  $1.02 \times 10^{-2}$  M.

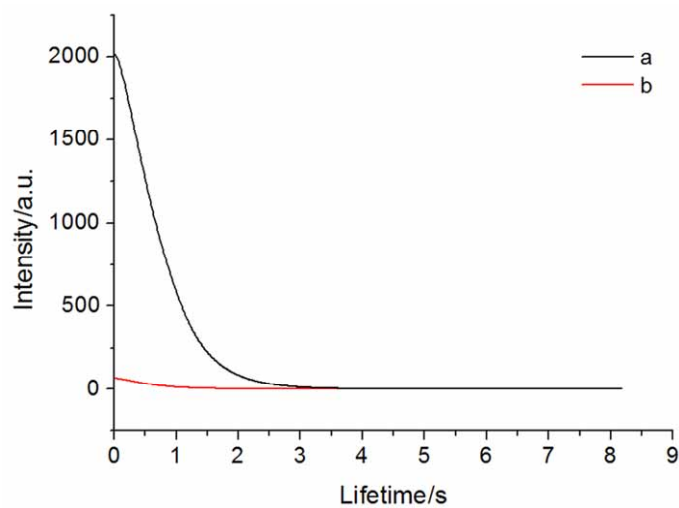

Figure S11. Decay of the phosphorescence intensity (a) ZnO/SiO<sub>2</sub> nanocomposite added PBS and (b) ZnO/SiO<sub>2</sub> nanocomposite added 0.01M Na<sub>2</sub>S.

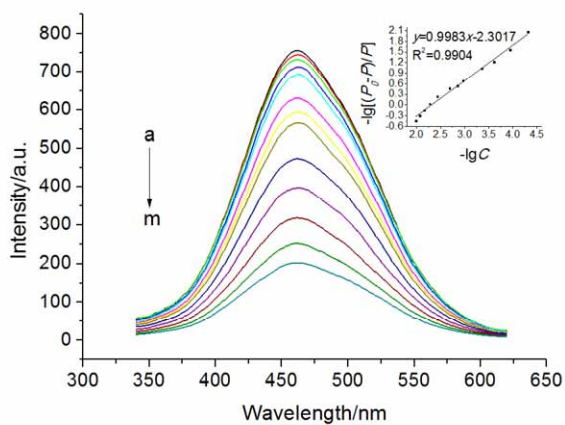

Figure S12. The effect of Na<sub>2</sub>S concentration on the emission spectra of sensor stored for five and a half months. The sulfide concentration: (a) 0, (b)  $4.88 \times 10^{-5}$ , (c)  $1.14 \times 10^{-4}$ , (d)  $2.44 \times 10^{-4}$ , (e)  $4.39 \times 10^{-4}$ , (f)  $1.09 \times 10^{-3}$ , (g)  $1.42 \times 10^{-3}$ , (h)  $2.07 \times 10^{-3}$ , (i)  $3.69 \times 10^{-3}$ , (j)  $5.32 \times 10^{-3}$ , (k)  $6.95 \times 10^{-3}$ , (l)  $8.57 \times 10^{-3}$  and (m)  $1.02 \times 10^{-2}$  M.



#### UV lamp and RTP photographs

A hand-held UV lamp produces short and long wavelengths UV radiation at 254 nm and 365 nm, respectively. As shown in Figure 5A (b2) and (b3), after the phosphorescence intensity at emission wavelength of 460 nm being quenched by sulfide, the excitation and emission wavelength change to 350 nm and 490 nm, respectively. As a result, when employing the UV radiation at 365 nm as the excitation light source, there are nearly no differences in the RTP intensity of the sensor with the addition of different concentrations of Na<sub>2</sub>S. We could only chose the UV radiation at 254 nm as the excitation light source to take the RTP photographs. And in view of the excitation wavelength of the ZnO/SiO<sub>2</sub> nanocomposite at 320 nm, the phosphorescence intensity upon excitation at 254 nm was nearly completely quenched by  $1.00 \times 10^{-2}$  M Na<sub>2</sub>S as shown in Figure 4B (d).
